# Supplementary material for: The cleavage of perylenequinones through photochemical oxidation acts as a detoxification mechanism for the producer
Source: Royal Society of Chemistry journal article supplement (doi:10.1039/c5ra02238j), 2015-01-01
Supplement: c5ra02238j1.pdf [file c5ra02238j1.pdf]

**Supporting information for “The cleavage of perylenequinones through  
photochemical oxidation acts as a detoxification mechanism for the  
generator”**

**Xiao-Bin Li,<sup>ab</sup> Wen-Qiang Chang,<sup>ab</sup> Sha Zheng,<sup>a</sup> Wei Li<sup>a</sup> and Hong-Xiang Lou<sup>\*a</sup>**

*<sup>a</sup>Department of Natural Product Chemistry, Key Lab of Chemical Biology of Ministry of Education,  
School of Pharmaceutical Sciences, Shandong University, 44 West Wenhua Road, Jinan 250012, P. R.  
China.*

*<sup>b</sup>Xiao-Bin Li and Wen-Qiang Chang contributed equally to this work.*

*\*Corresponding author.*

*Fax: +86-531-88382019; Tel: +86-531-88382012*

*E-mail: louhongxiang@sdu.edu.cn*

## List of Supporting Information

### Experimental Section

1. General experimental procedures
2. Perylenequinones preparation
3. CLSM observation
4. Photochemical reaction
5. Antimicrobial assays

**Fig. S1** The color alteration of fermentation extracts when exposed to ultraviolet irradiation.

**Fig. S2** HPLC chromatograms (67% MeOH-H<sub>2</sub>O; 0.8 mL/min; 280 nm) as a function of irradiation time obtained for the irradiation of calphostin D in acetonitrile solution (350 nm).

**Fig. S3** UV-visible absorption spectra of MeOH solution for HA and calphostin D.

**Fig. S4** UV-visible absorption spectra of MeOH solution for compounds **1–3**.

**Fig. S5** HPLC analysis (60–100% MeOH-H<sub>2</sub>O; 0.8 mL/min; 280 nm) of HA, calphostin D, and the fermentation supernatants of *Phaeosphaeria* sp. together with their photo-oxidation products.

**Fig. S6** The <sup>13</sup>C NMR spectrum (150 MHz) of compound **1** in CDCl<sub>3</sub>.

**Fig. S7** The <sup>1</sup>H NMR spectrum (600 MHz) of compound **1** in CDCl<sub>3</sub>.

**Fig. S8** The  $^{13}\text{C}$  NMR spectrum (150 MHz) of compound **2** in  $\text{CDCl}_3$ .

**Fig. S9** The  $^1\text{H}$  NMR spectrum (600 MHz) of compound **2** in  $\text{CDCl}_3$ .

**Fig. S10** The  $^{13}\text{C}$  NMR spectrum (150 MHz) of compound **3** in  $\text{CDCl}_3$ .

**Fig. S11** The  $^1\text{H}$  NMR spectrum (600 MHz) of compound **3** in  $\text{CDCl}_3$ .

**Table S1**  $^1\text{H}$  (600 MHz) and  $^{13}\text{C}$  (150 MHz) NMR data for compound **1** in  $\text{CDCl}_3$ .

**Table S2**  $^1\text{H}$  (600 MHz) and  $^{13}\text{C}$  (150 MHz) NMR data for compounds **2** and **3** in  $\text{CDCl}_3$ .

## References.

## Experimental section

### 1. General experimental procedures.

A daylight lamp with light intensity of  $30 \text{ W/m}^2$  was used for the visible light irradiation. The apparatus used for ultraviolet (UV) light irradiation was a Rayonet RPR-350 (Southern New England UV Co.) equipped with 16 fluorescent lamps and a merry-go-round. High-performance liquid chromatography (HPLC) was carried out on an Agilent Technologies 1260 infinity equipped with a ZORBAX SB-C<sub>18</sub> 5  $\mu\text{m}$  column (9.4  $\times$  250 mm). TLC was performed with glass precoated silica gel GF<sub>254</sub> plates (Qingdao Marine Chemical Co. Ltd.). UV-visible data were obtained on a UV-2450 spectrophotometer (Shimadzu, Japan). The compounds were visualized under UV (254 nm) light and by spraying with  $\text{H}_2\text{SO}_4/\text{EtOH}$  (1:9, v/v) followed by heating. NMR spectra

were recorded by a Bruker Avance-DRX-600 spectrometer operating at 600 ( $^1\text{H}$ ) and 150 ( $^{13}\text{C}$ ) MHz with TMS as an internal standard. MS were performed on a Finnigan LC-Q<sup>DECA</sup> mass spectrometer.

## **2. Perylenequinones preparation.**

Previously isolated endolichenic fungus identified as *Phaeosphaeria* sp. (GenBank: HQ324780) that generated perylenequinones (PQs)<sup>[1]</sup> was cultured on potato dextrose agar (PDA) plates. The colony was inoculated into liquid potato dextrose broth (PDB) and cultured in the darkness at 25 °C on a rotary shaker (110 rpm) for 20 days. The fermentation culture of *Phaeosphaeria* sp. was extracted by EtOAc. Hypocrellin A (HA) and calphostin D were obtained from *Phaeosphaeria* sp., which has been reported previously.<sup>1</sup>

## **3. CLSM observation.**

The mycelium was picked up from the culture and observed under a LSM700 confocal laser scanning microscopy (CLSM). 488 nm argon laser was used to excite the perylenequinones with 570–700 nm emission spectrum recorded.

## **4. Photochemical reaction.**

The crude EtOAc extracts were equally divided into three parts. They were respectively treated by visible light irradiation for 4 days, UV irradiation for 5 h or in the

darkness following with HPLC analysis.

A solution of HA (5 mg) in acetonitrile (5 mL) was exposed to a daylight lamp for a total of 48 h, or UV (8 fluorescent lamps) for 4 h. At indicated time, the samples were collected and confirmed by a combined experimental approach utilizing HPLC, TLC, and UV absorption. After evaporation of the solvent, compound **1** (2.5 mg) was separated from the reaction mixture by HPLC (90% MeOH/H<sub>2</sub>O, 1.8 mL/min).

Acetonitrile (15 mL) containing calphostin D (15 mg) was irradiated by UV (8 fluorescent lamps) for 9 h. The experimental approach was same as that used for HA. Compounds **2** (6.5 mg) and **3** (1.6 mg) were isolated from the reaction mixture using HPLC (75% MeOH/H<sub>2</sub>O, 1.8 mL/min).

## **5. Antimicrobial assays.**

*C. albicans* strain ATCC10231 was propagated in yeast-peptone dextrose (YPD) medium in an orbital shaker at 30 °C. *Staphylococcus aureus* ATCC6538 and *Bacillus subtilis* ATCC9372 strain were cultured in LB medium at 37 °C. The organisms were assayed in their culture conditions. One milliliter of microbial suspensions ( $2 \times 10^6$  CFUs/mL) were incubated in glass tubes with perylenequinones extracts, HA, calphostin D or their photochemical products at a serial of concentrations ranging from 0.125 to 16 µg/mL. For *C. albicans*, the mixtures were placed under a 9 W fluorescent lamp with light intensity of 10 W/m<sup>2</sup> for 20 min. For *Bacillus subtilis*, the organisms were incubated with the tested agents for 1 h in the darkness following with another 1h light irradiation.

After photodynamic treatments, aliquots of 100  $\mu\text{L}$  were taken out to determine the surviving CFUs.

**Fig. S1** The color alteration of fermentation extracts when exposed to ultraviolet irradiation.

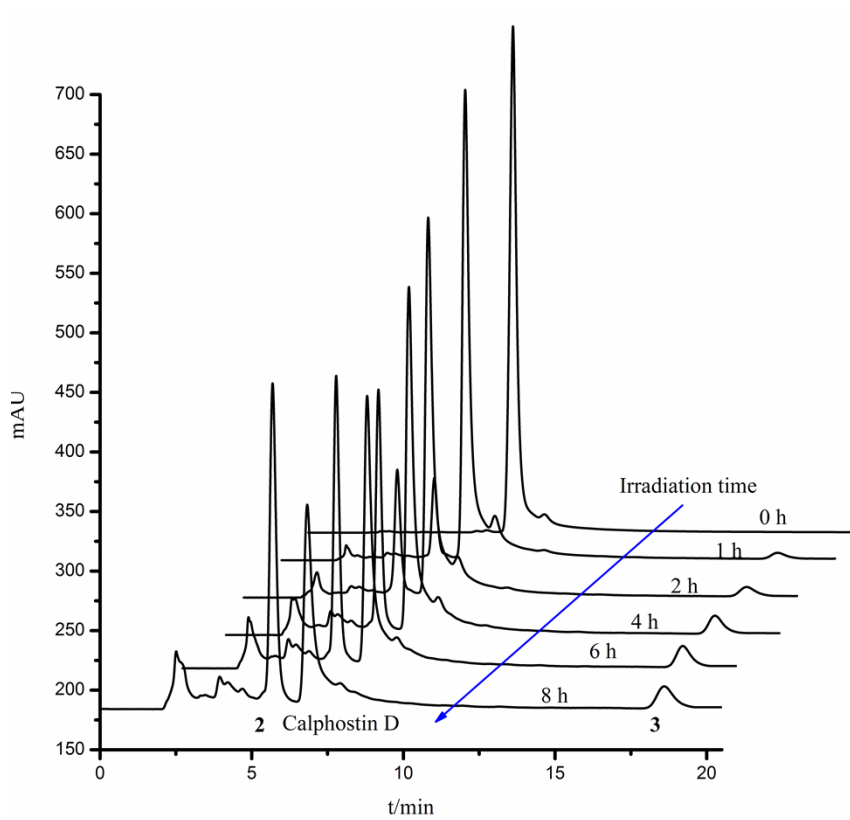

**Fig. S2** HPLC chromatograms (67% MeOH-H<sub>2</sub>O; 0.8 mL/min; 280 nm) as a function of irradiation time obtained for the irradiation of calphostin D in acetonitrile solution (350 nm).

**Fig. S3** UV-visible absorption spectra of MeOH solution for HA and calphostin D.

**Fig. S4** UV-visible absorption spectra of MeOH solution for compounds **1–3**.



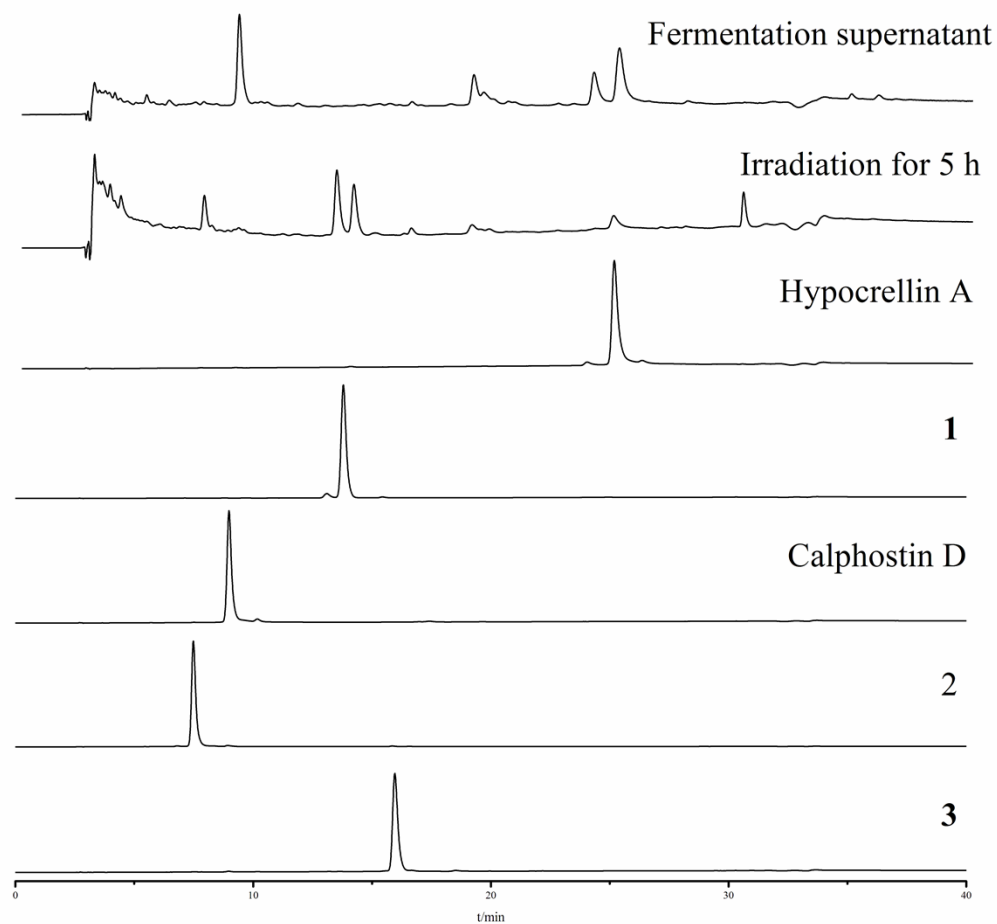

**Fig. S5** HPLC analysis (60–100% MeOH-H<sub>2</sub>O; 0.8 mL/min; 280 nm) of HA, calphostin D, and the fermentation supernatants of *Phaeosphaeria* sp. together with their photo-oxidation products.

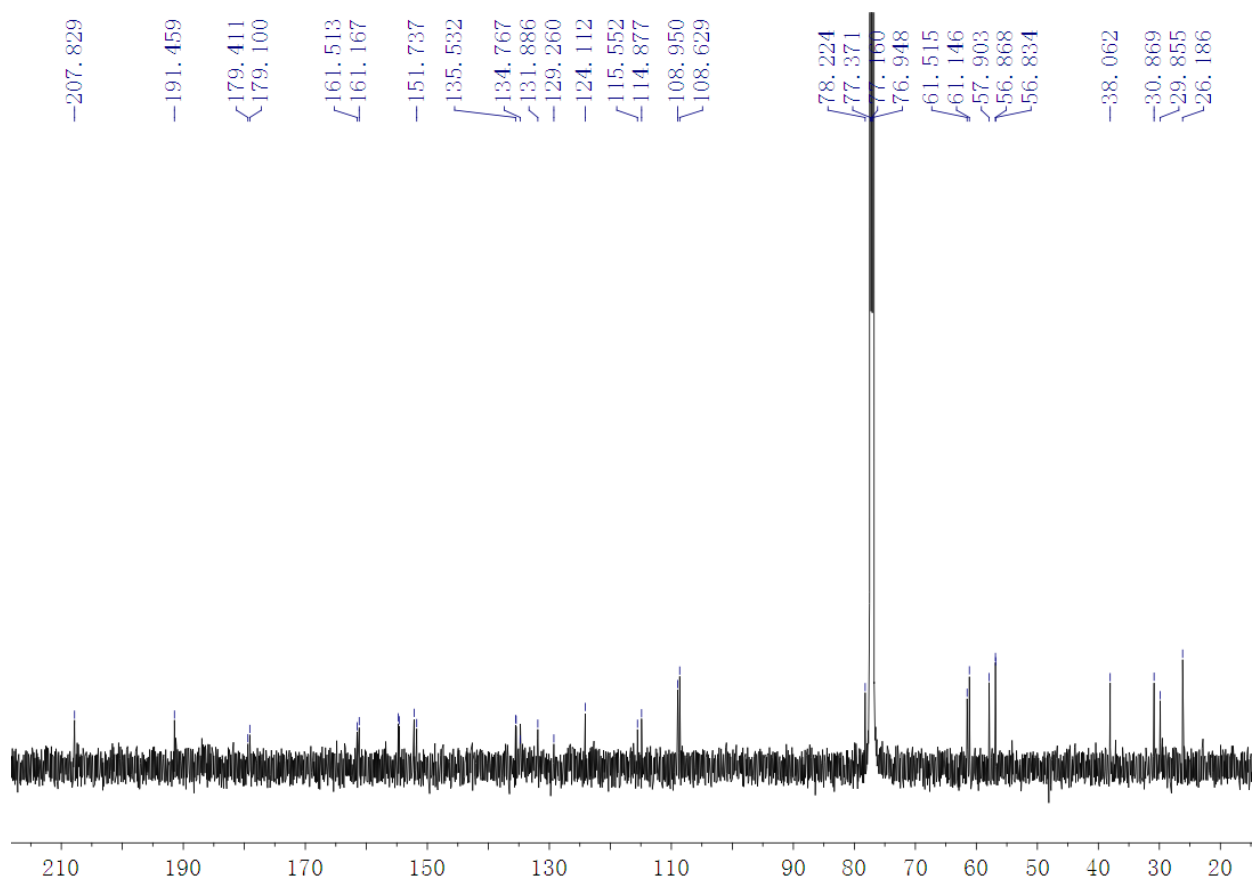

**Fig. S6** The  $^{13}\text{C}$  NMR spectrum (150 MHz) of compound **1** in  $\text{CDCl}_3$ .

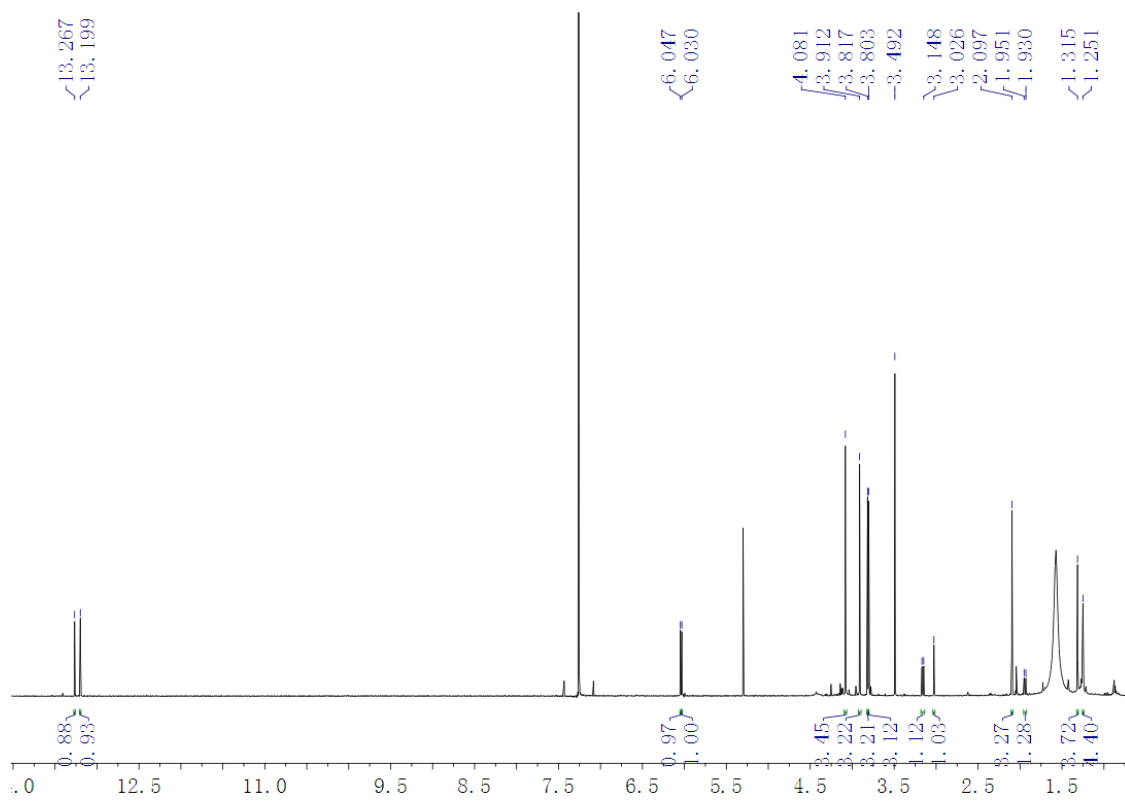

**Fig. S7** The  $^1\text{H}$  NMR spectrum (600 MHz) of compound **1** in  $\text{CDCl}_3$ .

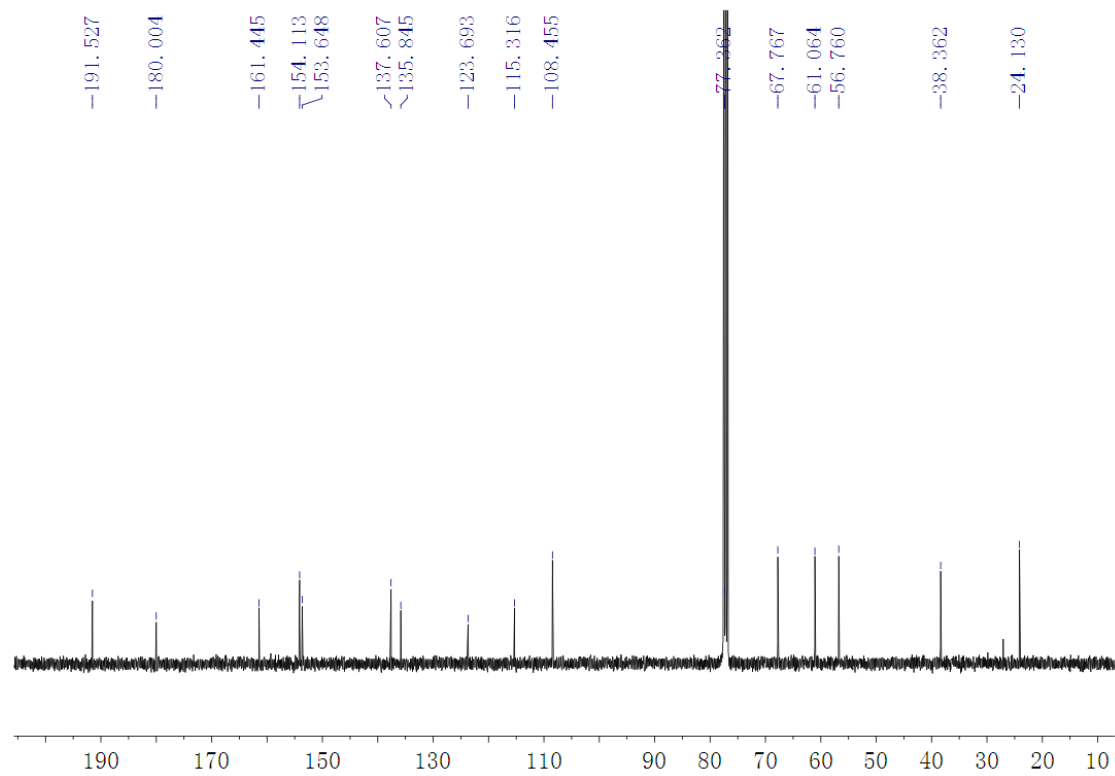

**Fig. S8** The  $^{13}\text{C}$  NMR spectrum (150 MHz) of compound **2** in  $\text{CDCl}_3$ .

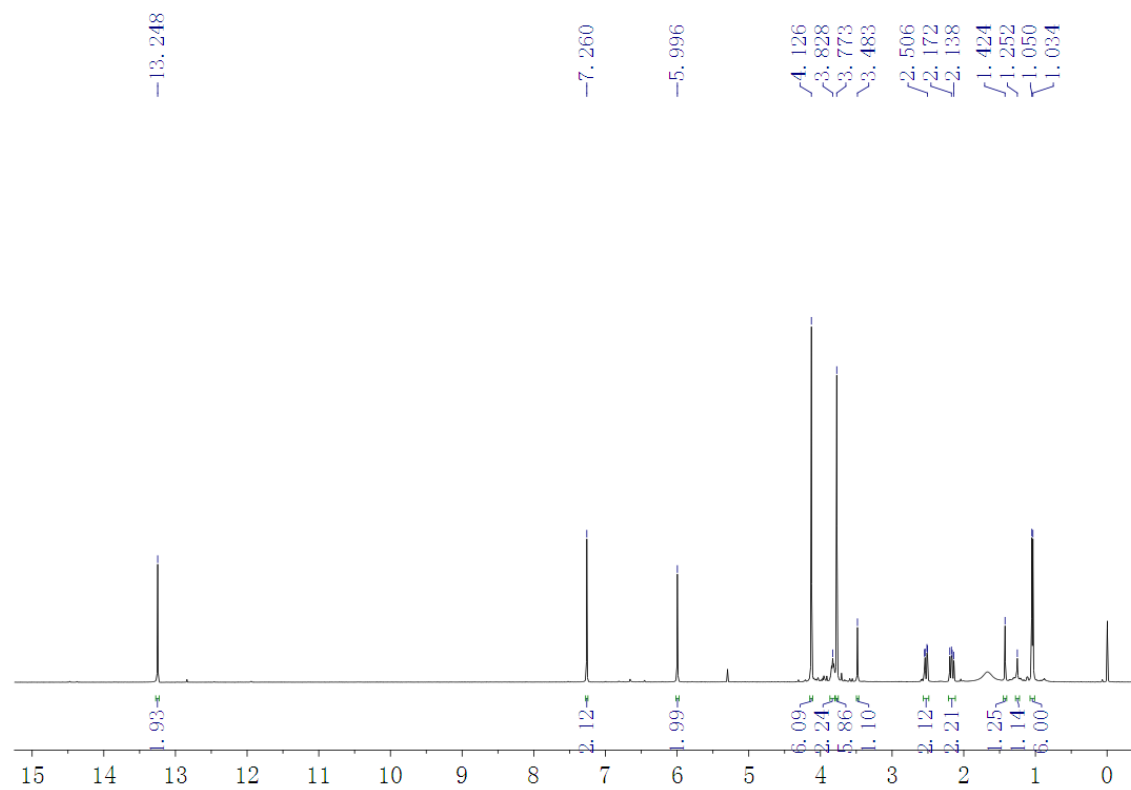

**Fig. S9** The <sup>1</sup>H NMR spectrum (600 MHz) of compound **2** in CDCl<sub>3</sub>.

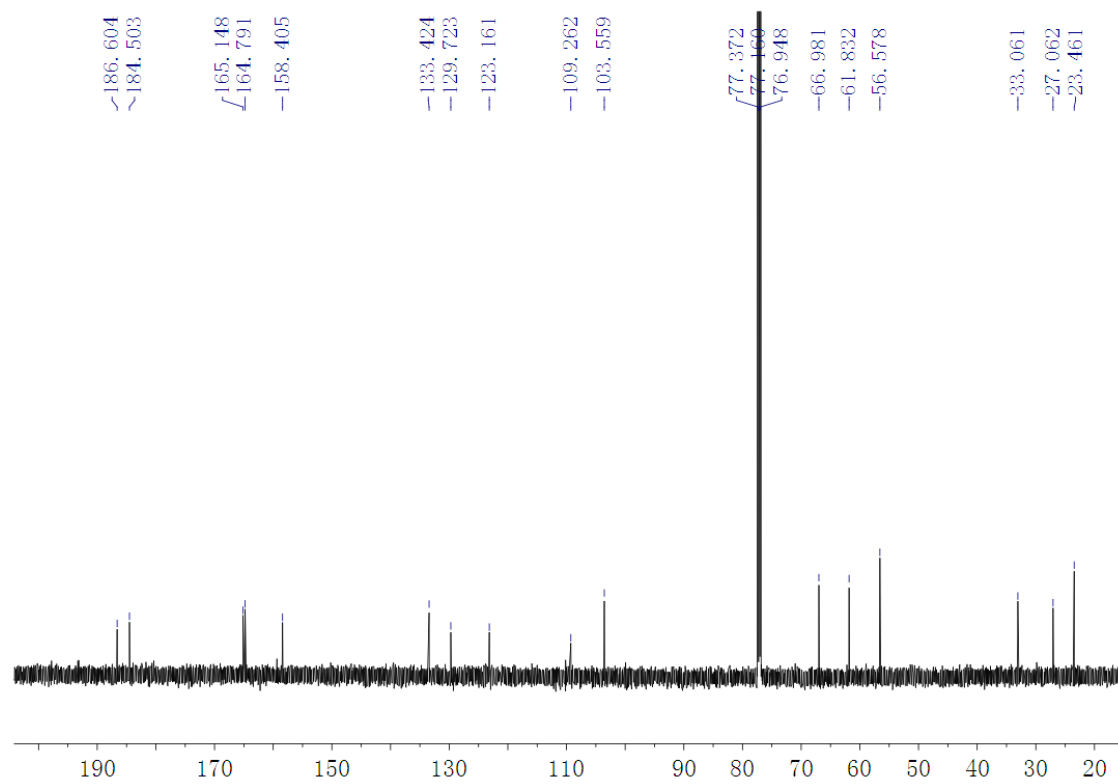

**Fig. S10** The  $^{13}\text{C}$  NMR spectrum (150 MHz) of compound **3** in  $\text{CDCl}_3$ .

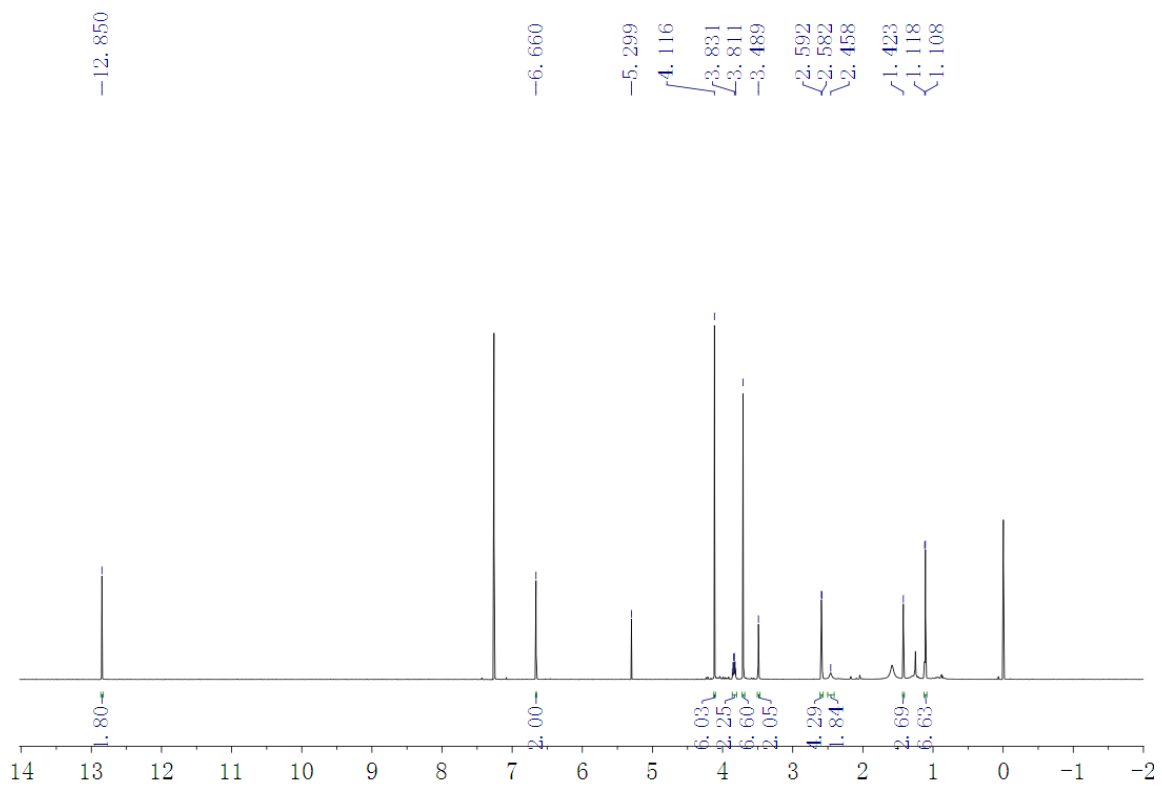

**Fig. S11** The <sup>1</sup>H NMR spectrum (600 MHz) of compound **3** in CDCl<sub>3</sub>.

**Table S1**  $^1\text{H}$  (600 MHz) and  $^{13}\text{C}$  (150 MHz) NMR data for compound **1** in  $\text{CDCl}_3$ .

| Position | $\delta_{\text{C}}$ , type | $\delta_{\text{H}}$ , mult. ( <i>J</i> in Hz) | Position | $\delta_{\text{C}}$ , type | $\delta_{\text{H}}$ , mult. ( <i>J</i> in Hz) |
|----------|----------------------------|-----------------------------------------------|----------|----------------------------|-----------------------------------------------|
| 1        | 131.9, C                   |                                               | 11       | 151.7, C                   |                                               |
| 1a       | 135.5, C                   |                                               | 12       | 134.7, C                   |                                               |
| 2        | 152.2, C                   |                                               | 12a      | 135.4, C                   |                                               |
| 3        | 154.8, C                   |                                               | 13       | 38.1, CH <sub>2</sub>      | 3.15, d (12.6)                                |
| 3a       | 114.9, C                   |                                               |          |                            | 1.94, d (12.6)                                |
| 3b       | 129.3, C                   |                                               | 14       | 78.2, C                    |                                               |
| 4        | 191.5, C                   |                                               | 15       | 57.9, CH                   | 3.03, s                                       |
| 5        | 108.9, CH                  | 6.05, s                                       | 16       | 26.2, CH <sub>3</sub>      | 1.32, s                                       |
| 6        | 161.2, C                   |                                               | 17       | 207.8, C                   |                                               |
| 6a       | 179.3, C                   |                                               | 18       | 30.9, CH <sub>3</sub>      | 2.10, s                                       |
| 7        | 161.5, C                   |                                               | 2-OMe    | 61.5, CH <sub>3</sub>      | 4.08, s                                       |
| 7a       | 179.1, C                   |                                               | 6-OMe    | 56.9, CH <sub>3</sub>      | 3.82, s                                       |
| 8        | 108.6, CH                  | 6.03, s                                       | 7-OMe    | 56.8, CH <sub>3</sub>      | 3.80, s                                       |
| 9        | 191.2, C                   |                                               | 11-OMe   | 61.1, CH <sub>3</sub>      | 3.91, s                                       |
| 9a       | 115.6, C                   |                                               | 3-OH     |                            | 13.20, s                                      |
| 9b       | 124.1                      |                                               | 10-OH    |                            | 13.27, s                                      |
| 10       | 154.6, C                   |                                               |          |                            |                                               |



**Table S2**  $^1\text{H}$  (600 MHz) and  $^{13}\text{C}$  (150 MHz) NMR data for compounds **2** and **3** in  $\text{CDCl}_3$ .

| Position      | <b>2</b>                   |                                               | <b>3</b>                   |                                               |
|---------------|----------------------------|-----------------------------------------------|----------------------------|-----------------------------------------------|
|               | $\delta_{\text{C}}$ , type | $\delta_{\text{H}}$ , mult. ( <i>J</i> in Hz) | $\delta_{\text{C}}$ , type | $\delta_{\text{H}}$ , mult. ( <i>J</i> in Hz) |
| 1, 12         | 137.6, C                   |                                               | 133.4, C                   |                                               |
| 1a, 12a       | 135.8, C                   |                                               | 186.6, C                   |                                               |
| 2, 11         | 153.6, C                   |                                               | 158.4, C                   |                                               |
| 3, 10         | 154.1, C                   |                                               | 184.5, C                   |                                               |
| 3a, 9a        | 115.3, C                   |                                               | 109.3, C                   |                                               |
| 3b, 9b        | 123.7, C                   |                                               | 129.7, C                   |                                               |
| 4, 9          | 191.5, C                   |                                               | 165.1, C                   |                                               |
| 5, 8          | 108.5, CH                  | 6.00, s                                       | 103.6, CH                  | 6.66, s                                       |
| 6, 7          | 161.4, C                   |                                               | 164.8, C                   |                                               |
| 6a, 7a        | 180.0, C                   |                                               | 123.2, C                   |                                               |
| 13, 16        | 38.4, CH <sub>2</sub>      | 2.53, dd (13.2, 3.0)<br>2.17, dd (13.6, 9.2)  | 33.1, CH <sub>2</sub>      | 2.58, d (6.0)                                 |
| 14, 17        | 67.8, CH                   | 3.83, m                                       | 67.0, CH                   | 3.83, m                                       |
| 15, 18        | 24.1, CH <sub>3</sub>      | 1.04, d (6.4)                                 | 23.5, CH <sub>3</sub>      | 1.11, d (6.0)                                 |
| 2-OMe, 11-OMe | 61.1, CH <sub>3</sub>      | 4.13, s                                       | 61.8, CH <sub>3</sub>      | 4.12, s                                       |
| 6-OMe, 7-OMe  | 56.8, CH <sub>3</sub>      | 3.77, s                                       | 56.6, CH <sub>3</sub>      | 3.71, s                                       |
| 3-OH, 10-OH   |                            | 13.25, s                                      |                            |                                               |
| 4-OH, 9-OH    |                            |                                               |                            | 12.85, s                                      |
| 14-OH, 17-OH  |                            |                                               |                            | 2.46, br. s                                   |

## References

1 G. Li, H. Y. Wang, R. X. Zhu, L. M. Sun, L. N. Wang, M. Li, Y. Y. Li, Y. Q. Liu, Z. T.

Zhao and H. X. Lou, *J. Nat. Prod.*, 2012, **75**, 142–147.
